# Supplementary material
Source: PubMed Central journal article supplement (PMC3161533)
Supplement: 1108564108_pnas.201108564SI.pdf [file 1108564108_pnas.201108564SI.pdf]

# Supporting Information

Yang and Baines 10.1073/pnas.1108564108

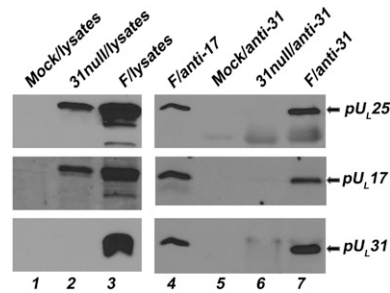

**Fig. S1.** Coimmunoprecipitation of pUL17, pUL25, and pUL31. CV1 cells were mock infected or were infected with HSV-1(F) or UL31 null virus. At 18 h after infection, cells were lysed. *Left:* Portions of the lysates were clarified, denatured in SDS, electrophoretically separated, transferred to nitrocellulose, and probed with antibodies to pUL25, pUL17 or pUL31. *Right:* Soluble lysates were reacted with pUL31-specific antibody, immune complexes were purified, denatured in SDS, and subjected to immunoblotting with anti-pUL25, anti-UL31, and anti-pUL17 antibodies.

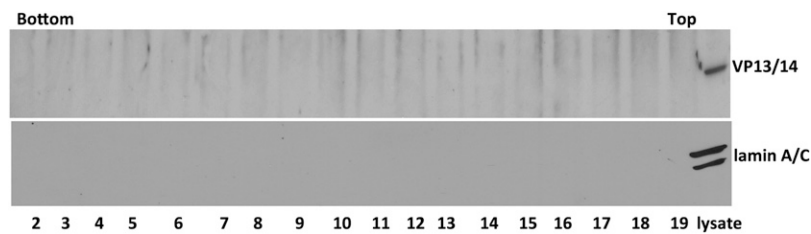

**Fig. S2.** Immunoblot of capsids separated in sucrose gradients and probed with antibodies to tegument proteins VP13/14 or lamin A/C. Capsids in HSV-1(F)-infected lysates were pelleted through a sucrose cushion, resuspended, and then separated by rate zonal centrifugation on two different continuous sucrose gradients. Protein in 0.5-mL TCA precipitated fractions collected from two different gradients were denatured, electrophoretically separated, and transferred to two different nitrocellulose sheets. One sheet was probed with antiserum to the major tegument protein VP13/14 (*Upper*), and the other was probed with monoclonal anti-lamin A/C, a nuclear lamina component (*Lower*). The lysate lanes contain total infected cell lysates solubilized in SDS.
